# Supplementary material for: Acid-assisted self-assembly of pyrene-capped tyrosine ruptures lysosomes to induce cancer cell apoptosis
Source: Royal Society of Chemistry journal article supplement (doi:10.1039/d4ra01328j), 2024-01-01
Supplement: d4ra01328j1.pdf [file d4ra01328j1.pdf]

## Supporting Information

### Acid-Assisted Self-Assembly of Pyrene-Capped Tyrosine Ruptures Lysosomes to Induce Cancer Cells Apoptosis

Jing Li <sup>1,2</sup>, Jiaqi Song <sup>3</sup>, Liang Shao <sup>3</sup>, Xianpeng Zhang <sup>3</sup>, Ziyi Wang <sup>1,2</sup>, Guanying Li <sup>3,\*</sup>,  
Jiansheng Wang <sup>1,2,\*</sup>, and Jia Zhang <sup>2,\*</sup>

1 Shaanxi University of Chinese Medicine, Xianyang Shaanxi, 712046, P. R. China.

2 The Department of Thoracic Surgery, The First Affiliated Hospital of Xi'an Jiaotong University, Xi'an Jiaotong University, Xi'an Shaanxi, 710061, P. R. China.

3 Department of Biophysics, School of Basic Medical Sciences, Xi'an Jiaotong University, Xi'an Shaanxi, 710061, P. R. China.

\* Correspondence: [guanyingli@xjtu.edu.cn](mailto:guanyingli@xjtu.edu.cn) (G.L.); [wangjsh@xjtu.edu.cn](mailto:wangjsh@xjtu.edu.cn) (J.W);  
[zhangjiaxjtu@xjtu.edu.cn](mailto:zhangjiaxjtu@xjtu.edu.cn) (J.Z.).

## Content

|                                             |   |
|---------------------------------------------|---|
| Synthesis .....                             | 3 |
| Supplementary Figures .....                 | 4 |
| Scheme S1 Synthesis .....                   | 4 |
| Figure S1 MS spectrum. ....                 | 4 |
| Figure S2 <sup>1</sup> H NMR spectrum.....  | 4 |
| Figure S3 Original emission spectra.....    | 5 |
| Figure S4 Normalized emission spectra. .... | 5 |
| Figure S5 UV-Vis spectra.....               | 6 |
| Figure S6 TEM images at pH 4.5. ....        | 7 |
| Figure S7 Time-dependent TEM images.....    | 8 |
| Figure S8 Confocal fluorescent images ..... | 8 |

## Synthesis

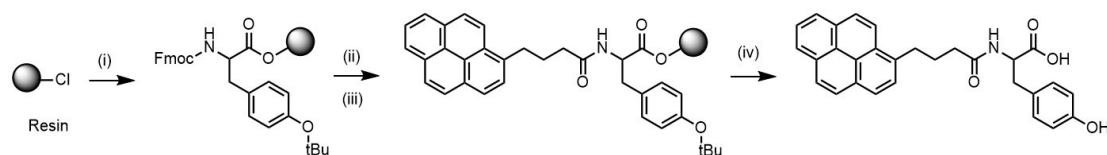

**Scheme S1.** Solid-phase synthesis of Py-Tyr. Reagents and conditions: (i) Fmoc-Tyr(tBu)-OH, DIEA; (ii) 5%Piperazine, 2%DBU, DMF; (iii) 1-Pyrenebutyric acid, HBTU, DIEA, DMF; (iv) 95%TFA, 5%DCM.

Target compound **Py-Tyr** was synthesized by solid phase synthesis on 2-chlorotritylchloride resin (Scheme S1). Resin (0.5g, approximate 0.5 mmol) was swollen in 5mL of DCM for 20 min and washed with DMF for 3 times. Fmoc-Tyr(tBu)-OH (0.57 g, 1.25 mmol) dissolved in 5mL anhydrous DMF in the presence of DIEA (0.43 mL, 2.5 mmol) was linked to resin for 30min. The resin was then washed with anhydrous DMF 3 times and unreacted sites on the resin were blocked with DIEA: MeOH: DCM (5: 15: 80) solution for 20min. The Fmoc capping group was removed with a 5% piperazine and 2% DBU in DMF for 10min. 1-Pyrenebutyric acid (0.43g, 1.5mmol) dissolved in 5mL anhydrous DMF in the presence of DIEA (0.52 mL, 3.0 mmol) and HBTU (0.57 g, 1.5 mmol) was added and reacted for 1 h at room temperature. The compound was cleaved off the resin by 95% TFA in DCM for 2h. The crude product was purified on an EClassical P3140 HPLC (Elite, China) equipped with a SinoChrom C18 column (ODS-BP, 10 $\mu$ m, 20.0mm  $\times$  250mm) to obtain white powders. Yield 0.18g, 79.8%.

# Supplementary Figures

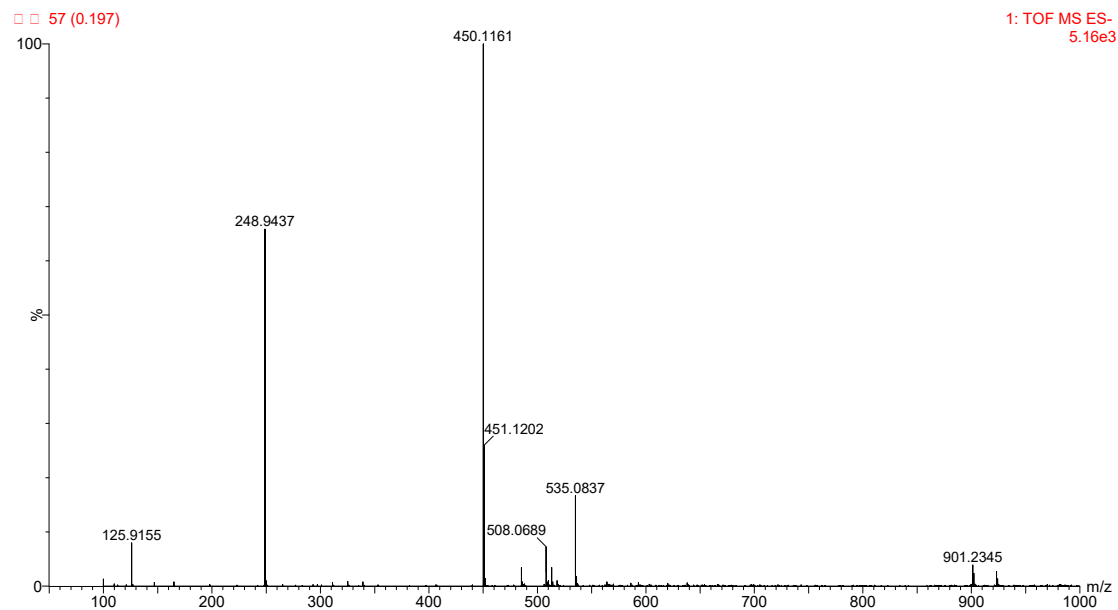

Figure S1. Mass spectrum of Py-Tyr in MeOH, negative mode.

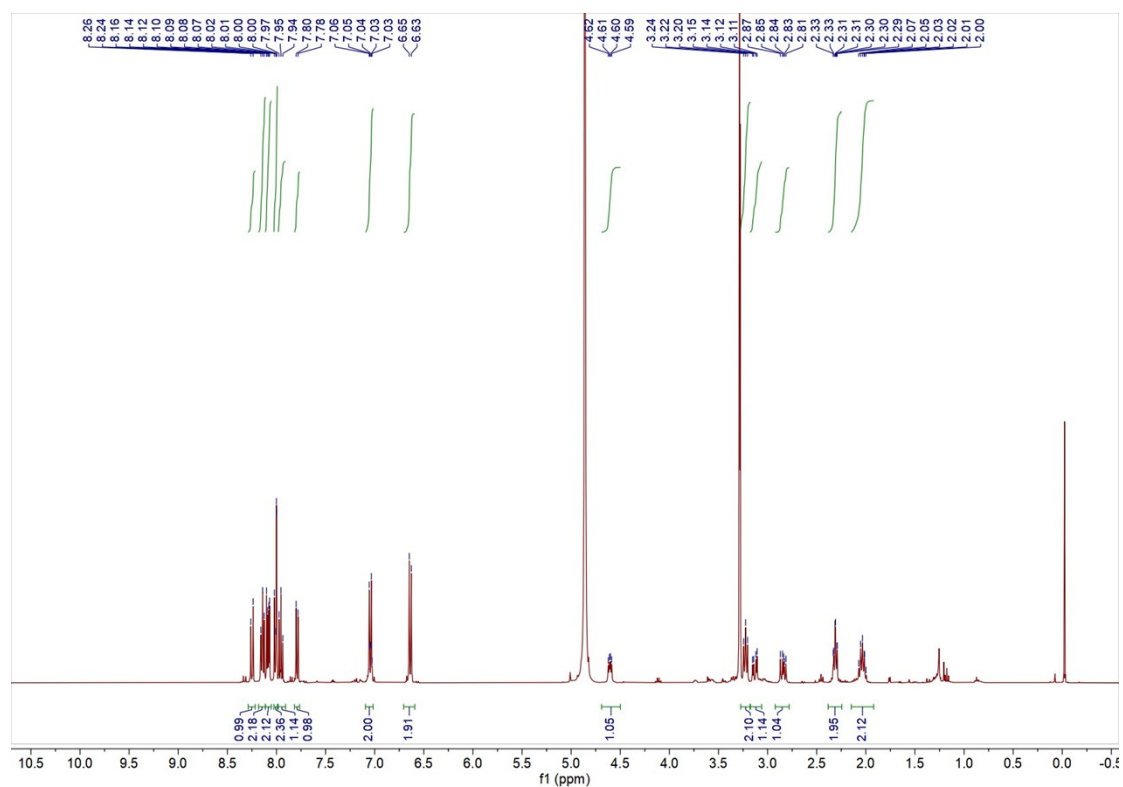

Figure S2. <sup>1</sup>H NMR spectrum of Py-Tyr in methanol-d<sub>4</sub>, 400MHz.

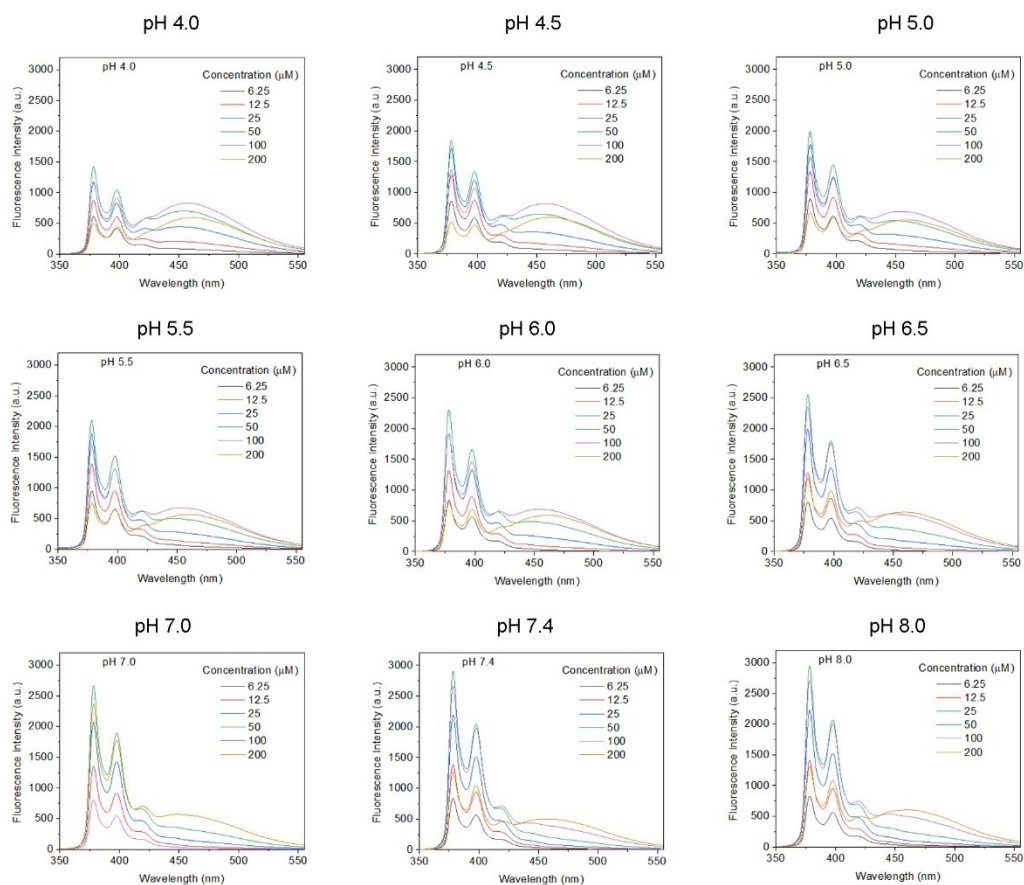

**Figure S3.** Emission spectra of **Py-Tyr** in citrate-phosphate buffer under different pH values. The concentration of **Py-Tyr** varied from 200, 100, 50, 25, 12.5 and 6.25  $\mu\text{M}$ .  $\lambda_{\text{exc}} = 342 \text{ nm}$ .

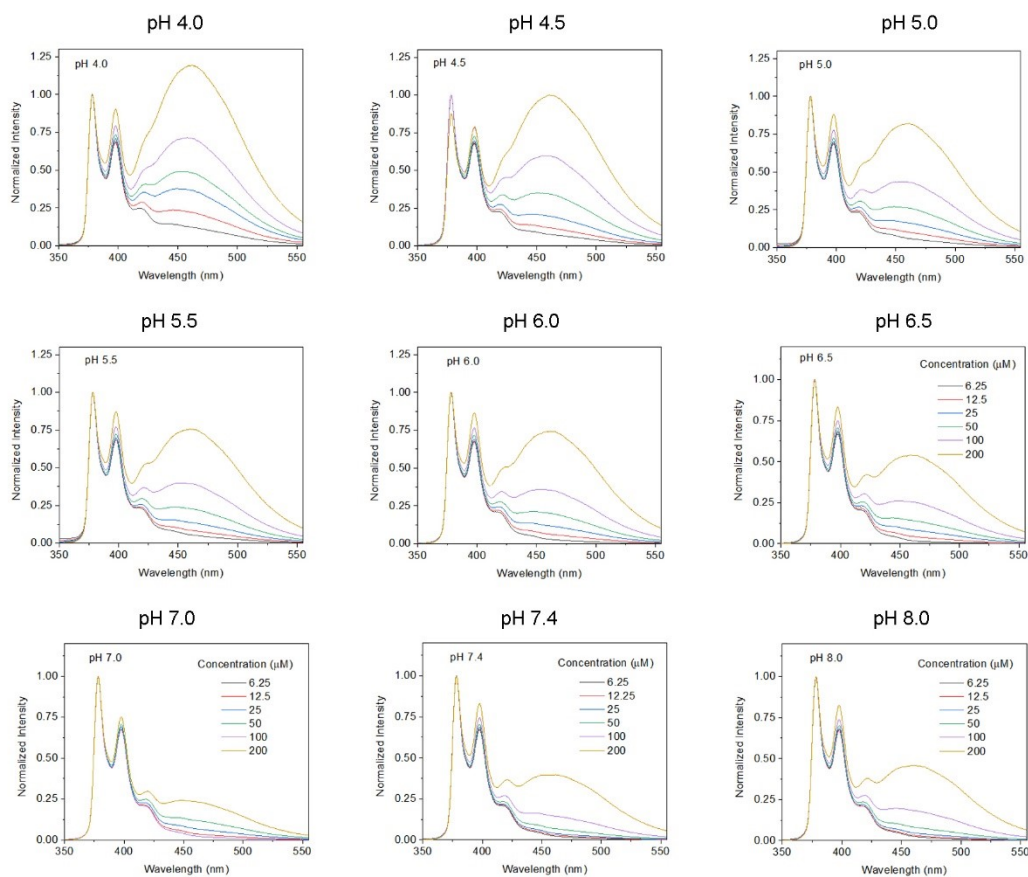

**Figure S4.** Normalized emission spectra of **Py-Tyr** in citrate-phosphate buffer under different pH values. The fluorescence intensity at 375nm was normalized to 1.0, respectively. The concentration of **Py-Tyr** varied from 200, 100, 50, 25, 12.5 and 6.25  $\mu\text{M}$ .  $\lambda_{\text{exc}} = 342 \text{ nm}$ . Note that the spectra at pH 4.0 and pH 7.4 were reproduced in **Fig. 1B** for demonstration. The intensity ratio at 458 nm and 375 nm ( $I_{458}/I_{375}$ ) of **Py-Tyr** in different concentrations and varied pH values was calculated and visualized using a heatmap in **Fig. 1C**.

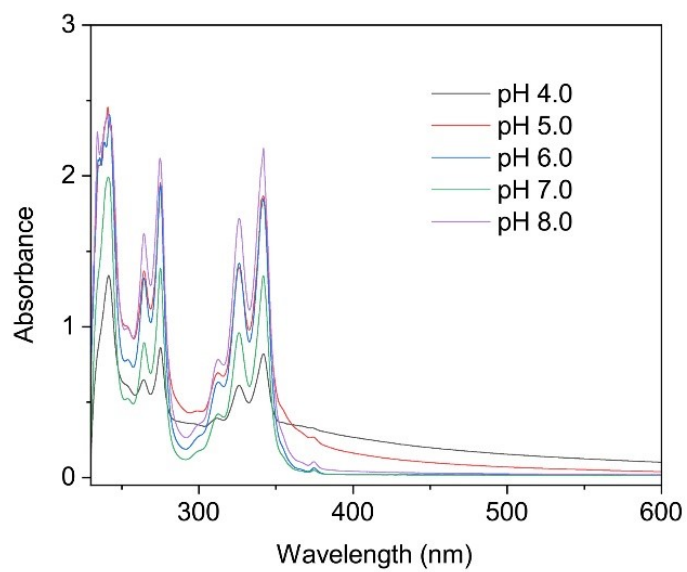

**Figure S5.** UV-Vis spectra of **Py-Tyr** (100 μM) in citrate-phosphate buffer under different pH values.

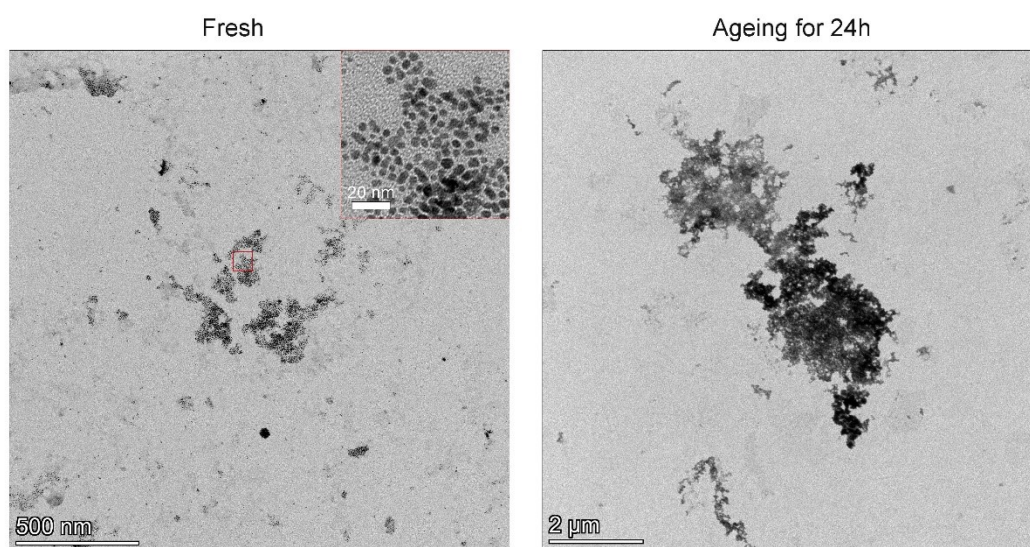

**Figure S6** TEM images of freshly prepared 100 μM **Py-Tyr** assemblies at pH 4.5, or after ageing for 24 hrs.

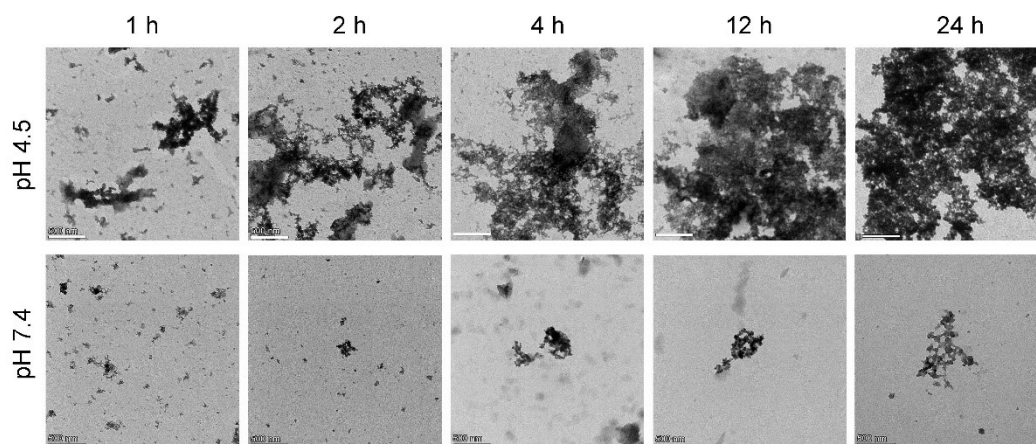

**Figure S7** TEM images of 100  $\mu\text{M}$  Py-Tyr assemblies at pH 4.5 or pH 7.4 after ageing for 1, 2, 4, 12, and 24 hrs. Scale bars represent 500 nm.

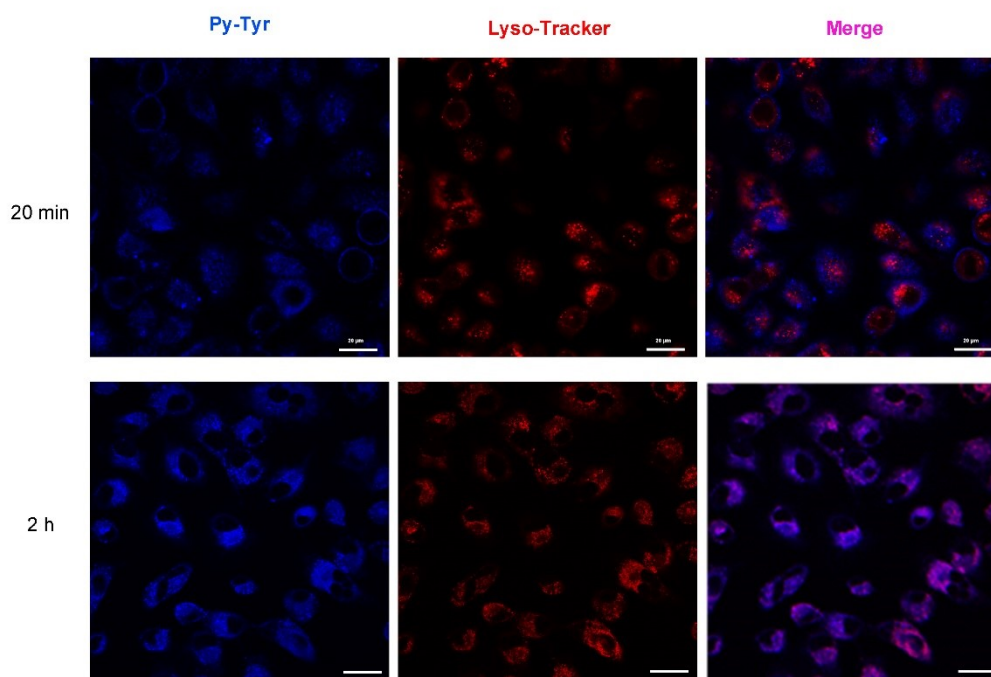

**Figure S8** CLSM images of A549 cells treated with 100  $\mu\text{M}$  Py-Tyr (blue) for 20min and for 2 hrs. Cells were co-stained with Lyso-Tracker Red DND-99 (Lyso-Tracker, red). Scale bars represent 20  $\mu\text{m}$ .
